# Supplementary material for: Sus1 maintains a normal lifespan through regulation of TREX-2 complex-mediated mRNA export
Source: PubMed Central journal article supplement (PMC9271307; doi:10.18632/aging.204146), 2022-06-29
Supplement: aging-14-204146-s003.pdf [file aging-14-204146-s003.pdf]

## SUPPLEMENTARY TABLES

**Supplementary Table 2. Plasmids used in this study.**

| Name             | Description                                                                                                            | Source     |
|------------------|------------------------------------------------------------------------------------------------------------------------|------------|
| pFA6a-HIS3MX6    | <i>pBR322 origin, Amp<sup>R</sup>, HIS3MX6, HIS3 gene from S. kluyveri.</i>                                            | [2]        |
| pFA6a-KanMX6     | <i>pBR322 origin, Amp<sup>R</sup>, KanMX6, KanMX gene contains the known kanr ORF of the E. coli transposon Tn903.</i> | [2]        |
| pFA6a-GFP-KIURA3 | <i>pBR322 origin, Amp<sup>R</sup>, URA3, GFP tag with URA3 gene</i>                                                    | [3]        |
| pFA6a-HA-KIURA3  | <i>pBR322 origin, Amp<sup>R</sup>, URA3, Triple HA tag with URA3 gene</i>                                              | [3]        |
| pGP564           | <i>2μ, Kan<sup>R</sup>, LEU2</i>                                                                                       | [4]        |
| YGPM2h11         | <i>2μ, Kan<sup>R</sup>, LEU2, [YBR109W-A]&amp;, [ALG1], YSA1, SUS1, CYC8, YBR113W, RAD16, [LYS2]&amp;</i>              | [4]        |
| YGPM5d22         | <i>2μ, Kan<sup>R</sup>, LEU2, [DAP1]&amp;, MEX67, YPL168W, REV3, YPL166W, [SET6], [MLH3]&amp;</i>                      | [4]        |
| YGPM6e10         | <i>2μ, Kan<sup>R</sup>, LEU2, [CUE5]&amp;, snR62, WHI2, YOR044W TOM6, DBP5, STD1, [RAT1]&amp;</i>                      | [4]        |
| YGPM25a15        | <i>2μ, Kan<sup>R</sup>, LEU2, [YKL187C]* MTR2 ASH1 SPE1 YKL183C-A [LOT5]*</i>                                          | [4]        |
| YGPM17i23        | <i>2μ, Kan<sup>R</sup>, LEU2, [RSM23]* CWC23 SOH1 SCS3 MET13 MON1 RPS2 YGL123C-A NAB2 GPG1 [PRP43]</i>                 | [4]        |
| pRS316           | <i>CEN/ARS, Amp<sup>R</sup>, URA3</i>                                                                                  | [5]        |
| pRS316-SUS1      | <i>CEN/ARS, Amp<sup>R</sup>, URA3, SUS1 ORF with +- 900 bp of UTR</i>                                                  | This study |
| pRS316-MEX67     | <i>CEN/ARS, Amp<sup>R</sup>, URA3, MEX67 ORF with +- 900 bp of UTR</i>                                                 | This study |
| pRS316-DBP5      | <i>CEN/ARS, Amp<sup>R</sup>, URA3, DBP5 ORF with +- 900 bp of UTR</i>                                                  | This study |
| pRS425           | <i>2μ, Amp<sup>R</sup>, LEU2</i>                                                                                       | [6]        |
| pRS425-SUS1      | <i>2μ, Amp<sup>R</sup>, LEU2, SUS1-HA with 900 bp upstream and 700 bp downstream of UTR</i>                            | This study |
| pRS425-MEX67     | <i>2μ, Amp<sup>R</sup>, LEU2, MEX67-HA with 900 bp upstream and 700 bp downstream of UTR</i>                           | This study |
| pRS425-DBP5      | <i>2μ, Amp<sup>R</sup>, LEU2, DBP5-HA with 900 bp upstream and 700 bp downstream of UTR</i>                            | This study |

**Supplementary Table 3. Mean lifespans and P values for RLS analysis.**

| Figure    | Strain | Strain description | Mean lifespan | P value compared to matched control strain |
|-----------|--------|--------------------|---------------|--------------------------------------------|
| Figure 1A | BY4741 | WT                 | 27.3          | control                                    |
|           | SY495  | <i>sus1Δ</i>       | 20.2          | 0.0006, ***                                |
|           | SY652  | <i>sus1Δ</i>       | 22.8          | 0.0120, *                                  |
|           | SY653  | <i>sus1Δ</i>       | 19.0          | 0.0001, ***                                |
|           | SY654  | <i>sus1Δ</i>       | 20.8          | 0.0009, ***                                |
| Figure 1C | BY4741 | WT                 | 19.2          | control                                    |
|           | SY495  | <i>sus1Δ</i>       | 13.8          | 0.0131, *                                  |
|           | FY231  | <i>ubp8Δ</i>       | 31.9          | <0.0001, ***                               |
|           | FY399  | <i>sgf11Δ</i>      | 23.8          | 0.3267, ns                                 |
|           | FY402  | <i>sgf73Δ</i>      | 45.4          | <0.0001, ***                               |
| Figure 1D | BY4741 | WT                 | 24.2          | control                                    |
|           | SY495  | <i>sus1Δ</i>       | 18.9          | 0.0002, ***                                |
|           | FY390  | <i>thp1Δ</i>       | 7.2           | <0.0001, ***                               |

|           |        |                     |      |              |
|-----------|--------|---------------------|------|--------------|
|           | FY391  | <i>sac3Δ</i>        | 9.3  | <0.0001, *** |
|           | FY451  | <i>sem1Δ</i>        | 22.5 | 0.0623, ns   |
|           | BY4741 | WT                  | 23.7 | control      |
| Figure 2A | SY495  | <i>sus1Δ</i>        | 17.2 | <0.0001, *** |
|           | FY231  | <i>ubp8Δ</i>        | 31.6 | 0.0020, **   |
|           | SY786  | <i>sus1Δ ubp8Δ</i>  | 18.8 | 0.0014, **   |
|           | BY4741 | WT                  | 21.9 | control      |
| Figure 2B | SY495  | <i>sus1Δ</i>        | 17.0 | 0.0051, **   |
|           | FY399  | <i>sgf11Δ</i>       | 26.3 | 0.0291, *    |
|           | SY787  | <i>sus1Δ sgf11Δ</i> | 19.1 | 0.2784, ns   |
|           | BY4741 | WT                  | 23.5 | Control      |
| Figure 2C | SY495  | <i>sus1Δ</i>        | 17.1 | <0.0001, *** |
|           | FY402  | <i>sgf73Δ</i>       | 40.4 | <0.0001, *** |
|           | SY797  | <i>sus1Δ sgf73Δ</i> | 23.5 | 0.3870, ns   |
|           | BY4741 | WT                  | 21.8 | control      |
| Figure 2D | SY495  | <i>sus1Δ</i>        | 16.7 | 0.0028, **   |
|           | FY391  | <i>sac3Δ</i>        | 8.5  | <0.0001, *** |
|           | SY784  | <i>sus1Δ sac3Δ</i>  | 12.5 | <0.0001, *** |
|           | BY4741 | WT                  | 25.6 | control      |
| Figure 2E | SY495  | <i>sus1Δ</i>        | 16.6 | <0.0001, *** |
|           | FY390  | <i>thp1Δ</i>        | 5.7  | <0.0001, *** |
|           | SY1087 | <i>sus1Δ thp1Δ</i>  | 5.1  | <0.0001, *** |
|           | BY4741 | WT                  | 24.2 | control      |
| Figure 2F | SY495  | <i>sus1Δ</i>        | 18.6 | <0.0001, *** |
|           | FY451  | <i>sem1Δ</i>        | 20.6 | 0.0188, *    |
|           | SY785  | <i>sus1Δ sem1Δ</i>  | 10.5 | <0.0001, *** |
|           | BY4741 | WT                  | 29.7 | <0.0001, *** |
|           | SY529  | <i>sir2Δ</i>        | 12.4 | control      |
| Figure 3A | SY557  | <i>sir2Δ ubp8Δ</i>  | 11.9 | 0.2598, ns   |
|           | SY559  | <i>sir2Δ sgf11Δ</i> | 13.9 | 0.1020, ns   |
|           | SY558  | <i>sir2Δ sgf73Δ</i> | 13.8 | 0.8582, ns   |
|           | BY4741 | WT                  | 29.3 | <0.0001, *** |
| Figure 3B | SY529  | <i>sir2Δ</i>        | 8.8  | control      |
|           | SY653  | <i>sus1Δ</i>        | 20.4 | 0.0006, ***  |
|           | SY699  | <i>sir2Δ sus1Δ</i>  | 11.0 | 0.0200, *    |
|           | BY4741 | WT                  | 23.7 | <0.0001, *** |
| Figure 3C | SY529  | <i>sir2Δ</i>        | 13.2 | control      |
|           | SY556  | <i>sir2Δ thp1Δ</i>  | 5.5  | <0.0001, *** |
|           | SY532  | <i>sir2Δ sac3Δ</i>  | 5.6  | <0.0001, *** |
|           | BY4741 | WT                  | 23.9 | control      |
| Figure 4D | FY395  | <i>MEX67-DAmP</i>   | 18.3 | 0.0007, ***  |
|           | FY396  | <i>MTR2-DAmP</i>    | 20.8 | 0.0781, ns   |

|           |        |                                          |      |              |
|-----------|--------|------------------------------------------|------|--------------|
|           | SY971  | <i>sus1Δ</i> + pGP564                    | 9.5  | control      |
| Figure 4E | SY972  | <i>sus1Δ</i> + YGPM2h11 ( <i>SUS1</i> )  | 28.3 | <0.0001, *** |
|           | SY973  | <i>sus1Δ</i> + YGPM5d22 ( <i>MEX67</i> ) | 16.1 | <0.0001, *** |
|           | SY974  | <i>sus1Δ</i> + YGPM6e10 ( <i>DBP5</i> )  | 24.8 | <0.0001, *** |
|           | SY1039 | <i>sus1Δ</i> + pRS425                    | 18.6 | control      |
| Figure 4G | SY1040 | <i>sus1Δ</i> + pRS425- <i>SUS1</i>       | 25.8 | <0.0001, *** |
|           | SY1041 | <i>sus1Δ</i> + pRS425- <i>MEX67</i>      | 23.7 | 0.0023, **   |
|           | SY1042 | <i>sus1Δ</i> + pRS425- <i>DBP5</i>       | 21.7 | 0.0408, *    |

\*\*\* $P \leq 0.001$ ; \*\* $P \leq 0.01$ ; \* $P \leq 0.05$ ; ns, not significant.

## SUPPLEMENTARY REFERENCES

- Ryu HY, Ahn S. Yeast histone H3 lysine 4 demethylase Jhd2 regulates mitotic rDNA condensation. *BMC Biol.* 2014; 12:75.  
<https://doi.org/10.1186/s12915-014-0075-3>  
PMID:25248920
- Longtine MS, McKenzie A 3rd, Demarini DJ, Shah NG, Wach A, Brachat A, Philippsen P, Pringle JR. Additional modules for versatile and economical PCR-based gene deletion and modification in *Saccharomyces cerevisiae*. *Yeast.* 1998; 14:953–61.  
[https://doi.org/10.1002/\(SICI\)1097-0061\(199807\)14:10<953::AID-YEA293>3.0.CO;2-U](https://doi.org/10.1002/(SICI)1097-0061(199807)14:10<953::AID-YEA293>3.0.CO;2-U)  
PMID:9717241
- Sung MK, Ha CW, Huh WK. A vector system for efficient and economical switching of C-terminal epitope tags in *Saccharomyces cerevisiae*. *Yeast.* 2008; 25:301–11.  
<https://doi.org/10.1002/yea.1588>  
PMID:18350525
- Jones GM, Stalker J, Humphray S, West A, Cox T, Rogers J, Dunham I, Prelich G. A systematic library for comprehensive overexpression screens in *Saccharomyces cerevisiae*. *Nat Methods.* 2008; 5:239–41.  
<https://doi.org/10.1038/nmeth.1181>  
PMID:18246075
- Sikorski RS, Hieter P. A system of shuttle vectors and yeast host strains designed for efficient manipulation of DNA in *Saccharomyces cerevisiae*. *Genetics.* 1989; 122:19–27.  
<https://doi.org/10.1093/genetics/122.1.19>  
PMID:2659436
- Christianson TW, Sikorski RS, Dante M, Shero JH, Hieter P. Multifunctional yeast high-copy-number shuttle vectors. *Gene.* 1992; 110:119–22.  
[https://doi.org/10.1016/0378-1119\(92\)90454-w](https://doi.org/10.1016/0378-1119(92)90454-w)  
PMID:1544568
